# Supplementary material for: Identification of Critical Amino Acids of Coxsackievirus A10 Associated with Cell Tropism and Viral RNA Release during Uncoating
Source: MDPI journal article supplement (doi:10.3390/v15102114), 2023-10-18
Supplement: s1 [file s1]

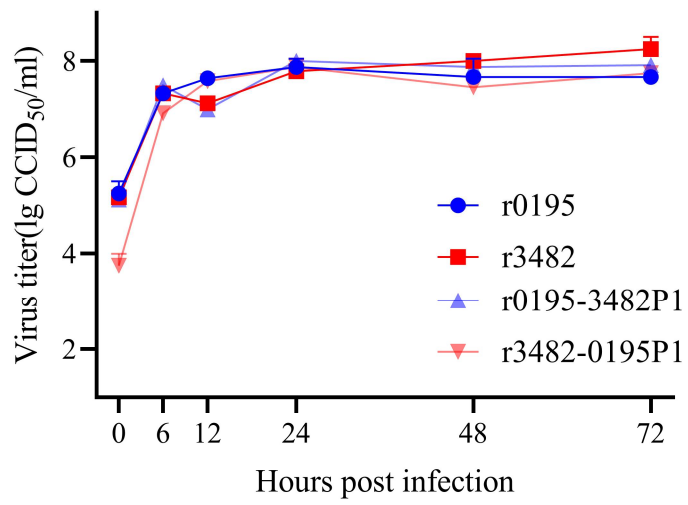

**Figure S1.** One-step growth curves for r0195, r3482, r0195-3482P1 and r3482-0195P1 in RD cells.

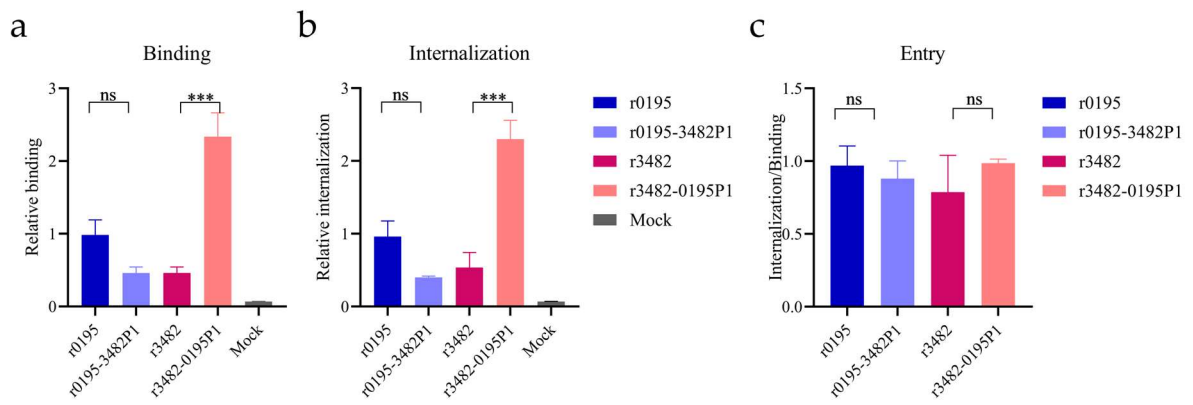

**Figure S2.** Binding and entry ability of r0195, r3482, r0195-3482P1 and r3482-0195P1 in RD cells. \*\*\*,  $p < 0.001$ , ns, no significance

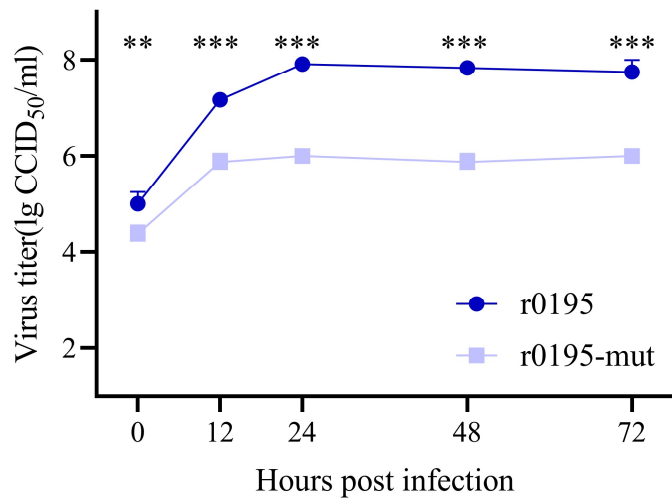

**Figure S3.** One-step growth curves for r0195 and r0195-mut in RD cells. \*\*,  $p < 0.01$ ; \*\*\*,  $p < 0.001$ .

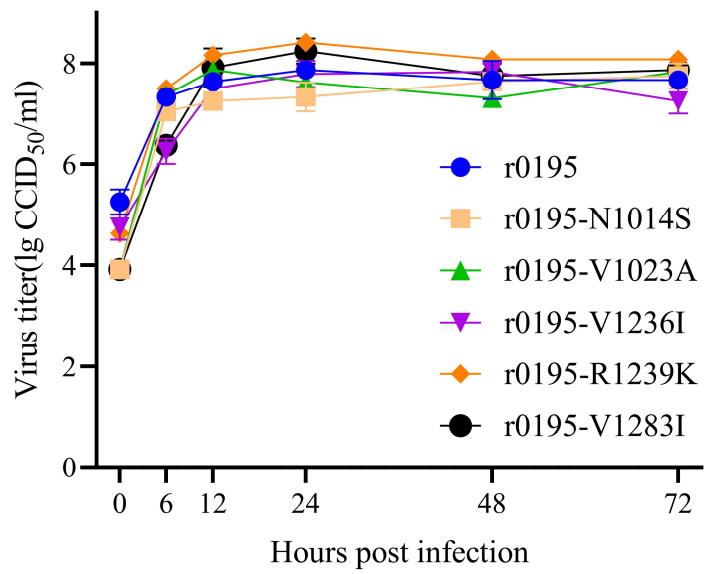

**Figure S4.** One-step growth curves for r0195 and r0195-mut in RD cells.
